# Supplementary material for: Genomics-guided identification of potential modulators of SARS-CoV-2 entry proteases, TMPRSS2 and Cathepsins B/L
Source: Research Square preprint supplement (doi:10.21203/rs.3.rs-138273/v1), 2021-01-01
Supplement: Supplementary file 1 [file 6e4cc03feb618524d75920cb.xlsx]

## Sheet: Table S1
Table S1. Involvement of TMPRSS2, CTSB, and CTSL genes in COVID-19 related gene sets obtained from Enrichr
Term	P-value	Adjusted P-value	Combined Score	Genes
MERS-CoV 38 Literature-Associated Genes from Geneshot GeneRIF	1.05322e-05	0.0021591	4021.43	CTSL;TMPRSS2
SARS top 50 Geneshot AutoRIF	1.83455e-05	0.00188041	2908.3	CTSL;TMPRSS2
SARS 133 Literature-Associated Genes from Geneshot GeneRIF	0.000131097	0.00895826	896.198	CTSL;TMPRSS2
Down-regulated by SARS-CoV-2 infection in Vero E6 from GSE153940	0.00147308	0.0754952	194.494	CTSL;CTSB
Up-regulated by MHV-A59 in murine liver 3d from GSE146074	0.00184024	0.0754499	167.943	CTSL;CTSB
COVID-19 patients PBMC up	0.00365571	0.124903	105.827	CTSL;CTSB
Genome-wide CRISPR screen reveals host genes that regulate SARS-CoV-2 infection	0.00404468	0.118451	1360.58	CTSL
ACE2 top 50 Geneshot AutoRIF	0.00748155	0.191715	652.709	TMPRSS2
TMPRSS2 top 50 Geneshot AutoRIF	0.00748155	0.170413	652.709	TMPRSS2
SARS-CoV-2/Human Interactome Gene Set from Guzzi	0.0137372	0.281612	310.699	TMPRSS2
SARS-CoV perturbation Down Genes bronchial epithelial 2B4 from GSE17400:GPL570:5	0.0280841	0.523386	126.016	CTSB
MERS-Cov Top 200 Predicted Genes from Geneshot GeneRIF via AutoRIF Co-Occurrence Gene Similarity	0.0297023	0.507414	117.218	TMPRSS2
SARS-CoV perturbation Down Genes Vero E6 from GSE30589:GPL570:6	0.0398115	0.627796	79.891	CTSL
SARS perturbation Up Genes PBMCs GDS1028:GPL201	0.0414166	0.606457	75.8113	CTSB
SARS-CoV perturbation Down Genes Vero E6 from GSE30589:GPL570:7	0.041854	0.572005	74.7601	CTSL
SARS-CoV perturbation Down Genes Vero E6 from GSE30589:GPL570:2	0.0601066	0.770116	45.8294	CTSL
Down-regulated by SARS-CoV-2 in ferret nasal wash from GSE147507	0.061689	0.743897	44.2167	TMPRSS2
SARS-CoV perturbation Down Genes Vero E6 from GSE30589:GPL570:3	0.0721454	0.821655	35.552	CTSL
Down-regulated by MERS infection of Calu3 cells	0.0731439	0.789184	34.871	CTSL
Down-regulated by MERS-CoV in Calu-3 from GSE122876	0.0731439	0.749725	34.871	CTSL
Up-regulated by MHV-A59 in murine liver 5d from GSE146074	0.0731439	0.714024	34.871	CTSB
Up-regulated by MHV-A59 in murine spleen 3d from GSE146074	0.0731439	0.681568	34.871	CTSB
Up-regulated by MHV-A59 in murine spleen 5d from GSE146074	0.0731439	0.651935	34.871	CTSB
Down-regulated by SARS-CoV-2 in intestinal organoids 24hr differentiation from GSE149312	0.0731439	0.624771	34.871	TMPRSS2
Up-regulated by SARS-CoV-2 in intestinal organoids 24hr expansion from GSE149312	0.0731439	0.59978	34.871	CTSL
Up-regulated by SARS-CoV-2 in intestinal organoids 60hr differentiation from GSE149312	0.0731439	0.576712	34.871	CTSL
Up-regulated by SARS-CoV-1 in intestinal organoids 24hr from GSE149312	0.0731439	0.555352	34.871	CTSL
Up-regulated by SARS-CoV-1 in intestinal organoids 60hr from GSE149312	0.0731439	0.535518	34.871	CTSL
COVID-19 patients BALF up	0.0984358	0.695839	22.7624	TMPRSS2
